# Supplementary material for: Diversity of Agroforestry Species and Uses in Two Ecological Regions: A Case from Central Nepal
Source: Hindawi journal article supplement (doi:10.1155/2021/1198341), 2021-10-31
Supplement: f1 [file 1198341.f1.docx]

**Diversity of agroforestry species and uses in two ecological regions: A case from central Nepal**

Hari Prasad Pandey1, *, Narayan Prasad Pokhrel1, Dol Raj Luitel2, Kamal Acharya3, 4, Kabita Kumari Shah5

Ministry of Forests and Environment, Singha Durbar, Kathmandu, Nepal

2 Department of Plant Resources, Kathmandu, Nepal

3 Division Forest Office, Sindhuli, Bagmati province, Nepal

4 School of Forest Sciences, University of Eastern Finland, Joensuu, Finland

5 Department of Plant Science, Pennsylvania State University, University Park, State College, Pennsylvania, 16802, U.S.A

*Corresponding author: [pandeyhp123@gmail.com](mailto:pandeyhp123@gmail.com)

**Annex**

Supplimentary material (S1): List of agroforestry species found in the study areas

| **S.N.** | **Nepali Name** | **Botanical Name** | **Family** | **Use value (primary)** |
| --- | --- | --- | --- | --- |
| 1 | Mung Daal | *Vigna radiata* (L.) R. Wilczek | Fabaceae | cereals, firewood |
| 2 | Aalaichi | *Amomum subulatum* Roxb. | Zingiberaceae | spice |
| 3 | Aalas | *Linum usitatissimum* L. | Linaceae | oil |
| 4 | Aaloo | *Solanum tuberosum* L. | Solanaceae | vegetable |
| 5 | Aanp | *Mangifera indica* L. | Anacardiaceae | fruits, medicinal |
| 6 | Aaru | *Prunus persica* (L.) Batsch | Rosaceae | fruit/ young leaves as insecticides (medicinal) |
| 7 | Asare Ful | *Lagerstroemia indica* (L). Pers. | Lythraceae | ornamental |
| 8 | Aduwa | *Zingiber officinale* Roscoe | Zingiberaceae | spice/ medicinal |
| 9 | Ghiu Kumari | *Aloe vera* (L.) Burm.f. | Xanthorrhoeaceae | ornamental/medicinal |
| 10 | Amala | *Phyllanthus emblica* L*.* | Phyllanthaceae | fruit/medicinal |
| 11 | Amba | *Psidium guajava* L. | Myrtaceae | fruit/ Medicinal |
| 12 | Amilo Bel | *Feronia limonia*(L.) Swingle | Rutaceae | spice |
| 13 | Amriso | *Thysanolaena latifolia* (Roxb. ex Hornem.) Honda | Poaceae | fodder, making broom |
| 14 | Anar | *Punica granatum* L. | Lythraceae | fruit/ medicinal |
| 15 | Ashoka | *Saraca asoca* (Roxb.) Willd | Fabaceae | ornamental |
| 16 | Badahar | *Artocarpus lacucha* Buch.-Ham. | Moraceae | fodder/medicinal |
| 17 | Bajradanti | *Potentilla reptans* L. | Rosaceae | medicinal |
| 18 | Bakaino | *Melia azedarach*  L. | Meliaceae | fodder/medicinal |
| 19 | Bamari | *Ocimum basilicum* L. | Lamiaceae | ornamental/Medicinal |
| 20 | Banda govi | *Brassica oleracea* L.var *capitata* L. | Brassicaceae | vegetable |
| 21 | Bahramase Ful (Pink) | *Hibiscus* rosa-sinensis L. | Malvaceae | ornamental |
| 22 | Bahramase Ful (White) | *Hibiscus syriacus L.* | Malvaceae | ornamental |
| 23 | Bans | *Dendrocalmus hemiltonii* Nees & Arn. ex Munro | Poaceae | timber/fodder |
| 24 | Nigalo | *Arundinaria* species Michx. | Poaceae | handicrafts, medicines for pain killer |
| 25 | Bedulo | *Ficus subincisa* Buch.-Ham. ex Sm. | Moraceae | fodder |
| 26 | Bel | *Aegle marmelos* L. | Rutaceae | Edible fruits/medicinal |
| 27 | Beli Ful | *Jasminum multiflorum* (Burm.f.) Andrews | Oleaceae | ornamental |
| 28 | Besar | *Curcuma longa* L. | Zingiberaceae | spice/medicinal |
| 29 | Bhatmas | *Glycine max* (L.) Merr. | Fabaceae | Pulses /oil |
| 30 | Bhogate | *Citrus maxima* Merr. | Rutaceae | fruit/spices |
| 31 | Bhui Katahar | *Ananas comosus* (L) Merr. | Bromeliaceae | fruit/ medicinal |
| 32 | Bimiro | *Citrus medica* L. | Rutaceae | fruit |
| 33 | Bodi | *Vigna unguiculata* (L) Walp. | Fabaceae | vegetable |
| 34 | Kagate Ful | *Bougainvillea spectabilis* Willd. | Nyctaginaceae | ornamental |
| 35 | Bro Cauli | *Brassica oleracea italica* | Brassicaceae | vegetable |
| 36 | Cauli | *Brassica oleracea* var. *botrytis* L. | Brassicaceae | vegetable |
| 37 | Chameli Ful | J*asminum officinale* L. | Oleaceae | ornamental |
| 38 | Chana | *Cicer arietinum* L. | Fabaceae | pulses |
| 39 | Chap | *Michelia champaca* (L.)Baill. Ex Pierre. | Magnoliaceae | timber/medicinal |
| 40 | Chichindo | *Trichosanthes cucumerina* L. | Cucurbitaceae | vegetable |
| 41 | Chilauni | *Schima wallichi* (DC.)Korth | Theaceae | timber/medicinal |
| 42 | Chiuri | *Diploknema butyracea* (Roxb.) H.J.Lam. | Sapotaceae | medicinal/ oil/fodder |
| 43 | Christmas tree | *Araucaria columnaris* Juss*.* | Araucariaceae | ornamental |
| 44 | Chuletro | *Brassaiopsis hainla* (Buch.-Ham.) Seem. | Araliaceae | fodder |
| 45 | Dab Dabe | *Garuga pinnata* Roxb. | Burseraceae | fodder |
| 46 | Lahure Ful | *Dahlia pinnata* Cav. | Asteraceae | ornamental |
| 47 | Dal Chini | *Cinnamomum zeylnicum* Blume. | Lauraceae | spices, medicinal |
| 48 | Damai Ful | *Ardisia solanaceae* Roxb. | Myrsinaceae | ornamental |
| 49 | Dhan | *Oryza sativa* L. | Poaceae | cereals |
| 50 | Dhaniya | *Coriandrum sativum* L. | Apiaceae | spices |
| 51 | Dhaturo | *Datura stramonium* L. | Solanaceae | traditional medicinal and religious value |
| 52 | Dhupi | *Juniperus communis* L. | Cupressaceae | ornamental |
| 53 | Dumri | *Ficus racemosa* L. | Moraceae | fodder |
| 54 | Farsi | *Cucurbita pepo* Mill. | Cucurbitaceae | vegetable |
| 55 | Gahun | *Triticum aestivum* L. | Poaceae | cereals |
| 56 | Gajar | *Daucus carota*L. | Apiaceae | vegetable |
| 57 | Glaichi Ful | *Verbena hybrida / Verbena officinalis* L. | Verbenaceae | ornamental |
| 58 | Ganja | *Cannabis sativa* L. | Cannabaceae | medicinal/ fiber |
| 59 | Ghanti Ful | *Leucas indica* (L.) R.Br. Ex. Vatke | Lamiaceae | ornamental |
| 60 | Ghadi Ful | *Passiflora caerulea* L. | Passifloraceae | ornamental |
| 61 | Ghiraula | *Luffa cylindrica* (L.) M. Roem. | Cucurbitaceae | vegetable |
| 62 | Godawari | *Chrysanthemum indicum* L*.* | Asteraceae | ornamental/medicinal |
| 63 | Golachi Ful | *Clerodendrum serratum* (L.) Moon | Verbenaceae | ornamental |
| 64 | Golveda | *Lycopersicon esculentum* Mill. | Solanaceae | spices/pickle |
| 65 | Gulab (Pink) | *Rosa rubiginosa* L. | Rosaceae | ornamental |
| 66 | Gulab (Red) | *Rosa kordesii* H.Wulff | Rosaceae | ornamental |
| 67 | Gulab (White) | *Rosa sericea* Lindl. | Rosaceae | ornamental |
| 68 | Haluwabed | *Diospyros kaki* L.f. | Ebenaceae | fruit |
| 69 | Imili | *Tamarindus indica* L. | Fabaceae | spices |
| 70 | Indra Kamal | *Gardenia jasminoides* J.Ellis | Rubiaceae | ornamental |
| 71 | Ipilipil | *Leucaena leucocephala* Lam. | Fabaceae | fodder |
| 72 | Eskus | *Sechium edule* (Jacq.) Swartz | Cucurbitaceae | vegetable |
| 73 | Jagar Palm | *Caryota urens* L. | Arecaceae | ornamental |
| 74 | Jamun | *Syzygium cumuni* (L.) Skeels | Myrtaceae | fruit/ medicinal |
| 75 | Jau | *Avena sativa*L. | Poaceae | traditional |
| 76 | Jimbu | *Allium hypsistum* Stearn. | Amaryllidaceae | spices/ medicinal |
| 77 | Kadam | *Neolamarckia cadamba* (Roxb.) Bosser | Rubiaceae | traditional medicine |
| 78 | Kafal | *Myrica esculenta* Buch.-Ham | Myricaceae | fruit/ medicine |
| 79 | Kagati | *Citrus aurantifolia* Christn | Rutaceae | fruit/spice/ medicine |
| 80 | Kakro | *Cucumis sativus* L. | Cucurbitaceae | fruit |
| 81 | Kamini Ful | *Murraya paniculat*a (L.) Jack | Rutaceae | ornamental |
| 82 | Kaner | *Nerium oleander* L. | Apocynaceae | ornamental |
| 83 | Kapas | *‎*Gossypium hirsutum L. | Malvaceae | traditional/making clothes/ fiber/religious |
| 84 | Kapur | *Cinnamomum camphora* (L.) J.Presl. | Lauraceae | camphor and timber production/ religious |
| 85 | Karela | *Momordica charantia* L. | Cucurbitaceae | pickle/vegetable |
| 86 | Katahar | *Artocarpus heterophyllus* Lam | Moraceae | fruit/ medicinal/fodder |
| 87 | Katus | *Castanopsis indica* (Roxb.) Miq. | Fagaceae | fruit/timber/ medicinal |
| 88 | Kaulo | *Machilus gamble*i King.ex.Hook.f. | Lauraceae | pickle/timber |
| 89 | Kavro | *Ficus lacor* Buch.-Ham. | Moraceae | fodder/ medicinal |
| 90 | Kera | *Musa paradisiaca* L. | Musaceae | fruit |
| 91 | Kera Ful | *Hedychium spicatum* Sm. in A.Rees | Zingiberaceae | ornamental |
| 92 | Kerau | *Pisum sativum* L. | Fabaceae | pulses |
| 93 | Karkalo | *Colocasia esculenta* (L.) Schott | Araceae | vegetable/pickle |
| 94 | Khurpani | *Prunus domestica* L. | Rosaceae | fruit |
| 95 | Khursani | *Capsicum annum* L. | Solanaceae | spices |
| 96 | Sankranta Bel/ Khursani Ful | *Pyrostegia venusta* Miers | Bignoniaceae | ornamental |
| 97 | Kimbu | *Morus alba* L. | Moraceae | fruit |
| 98 | Kodo | *Eleusine coracana* Gaertn. | Poaceae | cereals |
| 99 | Koiralo | *Bauhinia variegata* L. | Fabaceae | fodder/pickle/ medicinal |
| 100 | Kurilo | *Asparagus officinalis* L. | Liliaceae | medicinal/vegetable |
| 101 | Kusum | *Schleichera oleosa* (Lour.) Oken | Sapindaceae | fruit/ fodder |
| 102 | Kutmero | *Litsea monopelata* (Roxb.) Korth | Lauraceae | fodder |
| 103 | Laari Ful/Bajradanti | *Barleria cristata* L. | Acanthaceae | ornamental |
| 104 | Lakuri | *Fraxinus floribunda* Wall. | Oleaceae | timber/medicinal |
| 105 | Laalupate | *Euphorbia pulcherrima* Wild. Ex Kletzch | Euphorbiaceae | ornamental |
| 106 | Lapsi | *Choerospondias axillaris* (Roxb.) B.L.Brutt. & A.W.Hill. | Anacardiaceae | fruit |
| 107 | Lasun | *Allium sativum* L. | Amaryllidaceae | spices |
| 108 | Latte sag | *Amaranthus viridis* L. | Amaranthaceae | vegetable |
| 109 | Lauka | *Lageenaria siceraria* (Mol.) | Cucurbitaceae | vegetable |
| 110 | Litchi | *Litchi chinensis* Sonner | Sapindaceae | fruit |
| 111 | Lwang | *Caryophyllus aromaticus* L. | Myrtaceae | spices |
| 112 | Maachcha Ful | *Asclepias curassavica* L. | Apocynaceae | ornamental |
| 113 | Makai | *Zea mays* L. | Poaceae | fruit |
| 114 | Malati Ful | *Mirabilis jalapa* L. | Nyctaginaceae | ornamental |
| 115 | Marahatti | *Spilanthes clava* DC. | Asteraceae | medicinal/specimen |
| 116 | Mass | *Vigna mungo* (L.) Hepper | Fabaceae | pulses |
| 117 | Mahuwa | *Madhuca longifolia* (J.Konig) J.F.Macbr. | Sapotaceae | fodder/ medicinal |
| 118 | Mehendi | *Lawsonia inermis* L. | Lythraceae | ornamental/traditional |
| 119 | Mewa | *Carica papaya* L. | Caricaceae | fruit |
| 120 | Mula | *Raphanus sativa L.* | Brassicaceae | vegetable |
| 121 | Musuro Dal | *Lens culinaris* Medikus | Fabaceae | pulses |
| 122 | Nariwal | *Cocos nucifera* L | Arecaceae | fruit |
| 123 | Naspaati | *Pyrus communis* L. | Rosaceae | fruit |
| 124 | Neem | *Azadirachta indica* A.Juss. | Meliaceae | medicinal |
| 125 | Nimaro | *Ficus auriculata* Lour. | Moraceae | fodder |
| 126 | Paiyu | *Prunus cerasoides* D. Don. | Rosaceae | fodder/timber/ medicine |
| 127 | Pakhuri | *Ficus glaberrima* Blume. | Moraceae | fodder |
| 128 | Parijaat | *Nyctanthes arbor-tristis* L. | Oleaceae | ornamental/traditional/ medicinal |
| 129 | Parbar | *Trichosanthes dioica* Roxb. | Cucurbitaceae | vegetable |
| 130 | Tite Paati | *Artemisia vulgaris* L. | Asteraceae | medicinal |
| 131 | Pipal | *Ficus religiosa* L. | Moraceae | Religious/ medicinal |
| 132 | Pudina | *Mentha spicata* L. | Lamiaceae | ornamental/ medicinal |
| 133 | Pyaj | *Allium cepa* L. | Amaryllidaceae | spices |
| 134 | Adahar Daal | *Cajanus cajan* (L.) Huth | Fabaceae | pulses |
| 135 | Rajma | *Phaseolus vulgaris* L. | Fabaceae | pulses |
| 136 | Rakta Chandan | *Pterocarpus santalinus L.* | Fabaceae | medicinal/timber |
| 137 | Raayo ko Sag | *Brassica juncea* Czern. & Coss. | Brassicaceae | vegetable |
| 138 | Rittha | *Sapindus mukorossi* Gaertn. | Sapindaceae | timber/ medicinal |
| 139 | Rohini | *Mallotus philippensis*(Lam.)Muller | Euphorbiaceae | medicinal |
| 140 | Rudrakshya | *Elaeocarpus sphaericus* (Gaertn.) K. Schum. | Eleocarpaceae | Religious / medicinal |
| 141 | Saal | *Shorea robusta* Gaertn. | Dipterocarpaceae | traditional/timber |
| 142 | Salifa | *Annona squamosa*L. | Annonaceae | fruit |
| 143 | Sallo | *Pinus wallichiana* Sargent | Pinaceae | timber |
| 144 | Swami | *Ficus benjamina* L. | Moraceae | Religious/ medicinal |
| 145 | Sarpagandha | *Rauvolfia serpentina* (L.) Benth. | Apocynaceae | ornamental/medicinal |
| 146 | Sayapatri | *‎*Tagetes *erecta* L*.* | Asteraceae | ornamental |
| 147 | Silam | *Perilla frutescens* (L.) Britton | Lamiaceae | spices |
| 148 | Simi | *Dolichos lablab* L. | Fabaceae | vegetable |
| 149 | Sunkauli/Tejpat | *Cinnamomum tamala* (Buch.-Ham. T.Nees & C.H.Eberm. | Lauraceae | spices/ medicinal |
| 150 | Sindoor | *Bixa Orellana* L. | Bixaceae | traditional |
| 151 | Srikhanda | *Santalum album* L. | Santalaceae | medicinal/religious |
| 152 | Sisoo | *Dalbergia sissoo* Roxb. | Fabaceae | timber |
| 153 | Kane Siudi | *Euphorbia royleana* Boiss | Euphorbiaceae | ornamental |
| 154 | Stevia | *Stevia rebaudiana* (Bertoni) Bertoni | Asteraceae | medicinal |
| 155 | Suntala | *Citrus reticulata* Blanco. | Rutaceae | fruit |
| 156 | Supari | *Areca catechu* L. | Arecaceae | nuts/medicinal |
| 157 | Makhamali Ful | *Gomphrena globosa* L. | Amaranthaceae | ornamental |
| 158 | Teeju | *Diospyros melanoxylon* Roxb. | Ebenaceae | timber |
| 159 | Til | *Sesamum orientale* L. | Pedalliaceae | spices |
| 160 | Tiuriko Ful | *Impatiens scabrida* DC. | Balsaminaceae | ornamental |
| 161 | Tuni | *Toona ciliata* M.Roem | Meliaceae | fodder |
| 162 | Tori | *Brassica campestri*s L. var. toria | Brassicaceae | oil |
| 163 | Tuki Ful | *Myriactis nepalensis* Less. | Asteraceae | ornamental |
| 164 | Tulsi | *Ocimum sanctum* L. | Lamiaceae | religious/medicinal |
| 165 | Tulsi Ful | *Salvia splendens* Sellow ex J.A. Schultes | Lamiaceae | ornamental |
| 166 | Ukhu | *Saccharum officinarum* L. | Poaceae | fruit/traditional |
| 167 | Utis | *Alnus nepalensis* D.Don | Betulaceae | timber |
| 168 | Madumalati Ful | *Combretum indicum* (L.) DeFilipps | Combretaceae | ornamental |
| 169 | Vanta | *Solanum melongena* L. | Solanaceae | vegetable |
| 170 | Viks | *Plectranthus purpuratus* Harv. | Lamiaceae | medicinal |
| 171 | Bhindi | *Abelmoschus esculentus* (L.) Moench. | Malvaceae | vegetable |
